# Supplementary material for: Quantifying the emission changes and associated air quality impacts during the COVID-19 pandemic in North China Plain: a response modeling study
Source: Copernicus journal article supplement (doi:10.5194/acp-2020-522), 2020-07-14
Supplement: Supplementary file 1 [file acp-2020-522-supplement.pdf]

1    **Supplementary information for the manuscript *Quantifying the emission changes and associated***  
2    ***air quality impacts during the COVID-19 pandemic in North China Plain: a response modeling study***  
3

4

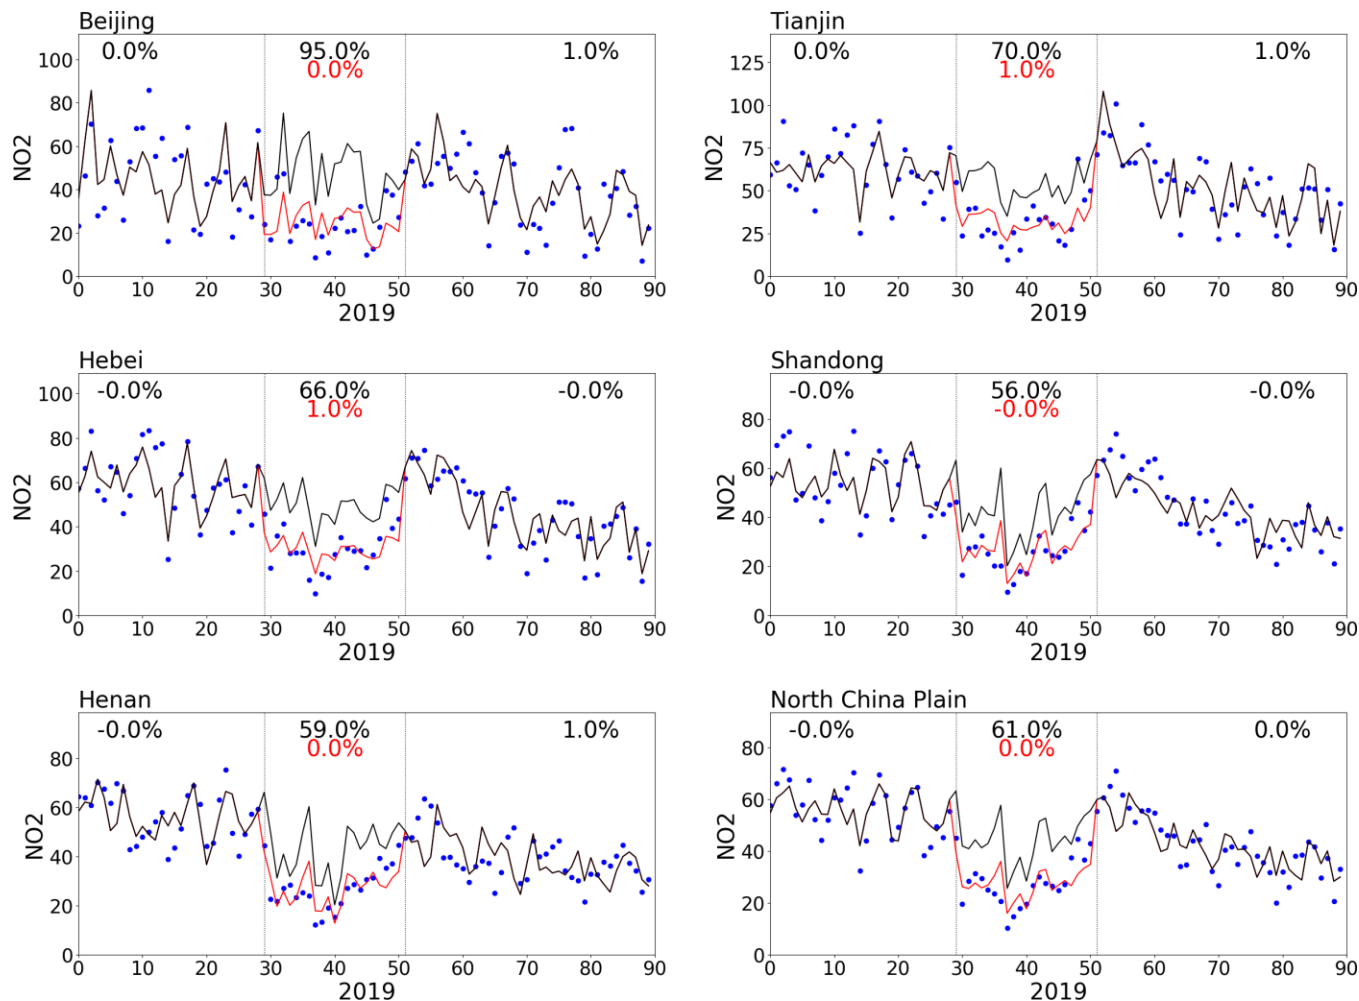

5

6 **Figure S1** Comparison of the simulated average concentrations of NO<sub>2</sub> in NCP (the percentage numbers  
7 indicate the normalized mean biases in hypothesis and actual simulations respectively for Period 2. Blue  
8 dots: observations; Black line: simulations using adjusted emission with no consideration of shutdown  
9 influences; Red line: simulations using adjusted emission with consideration of shutdown influences;  
10 unit:  $\mu\text{g m}^{-3}$ )

11

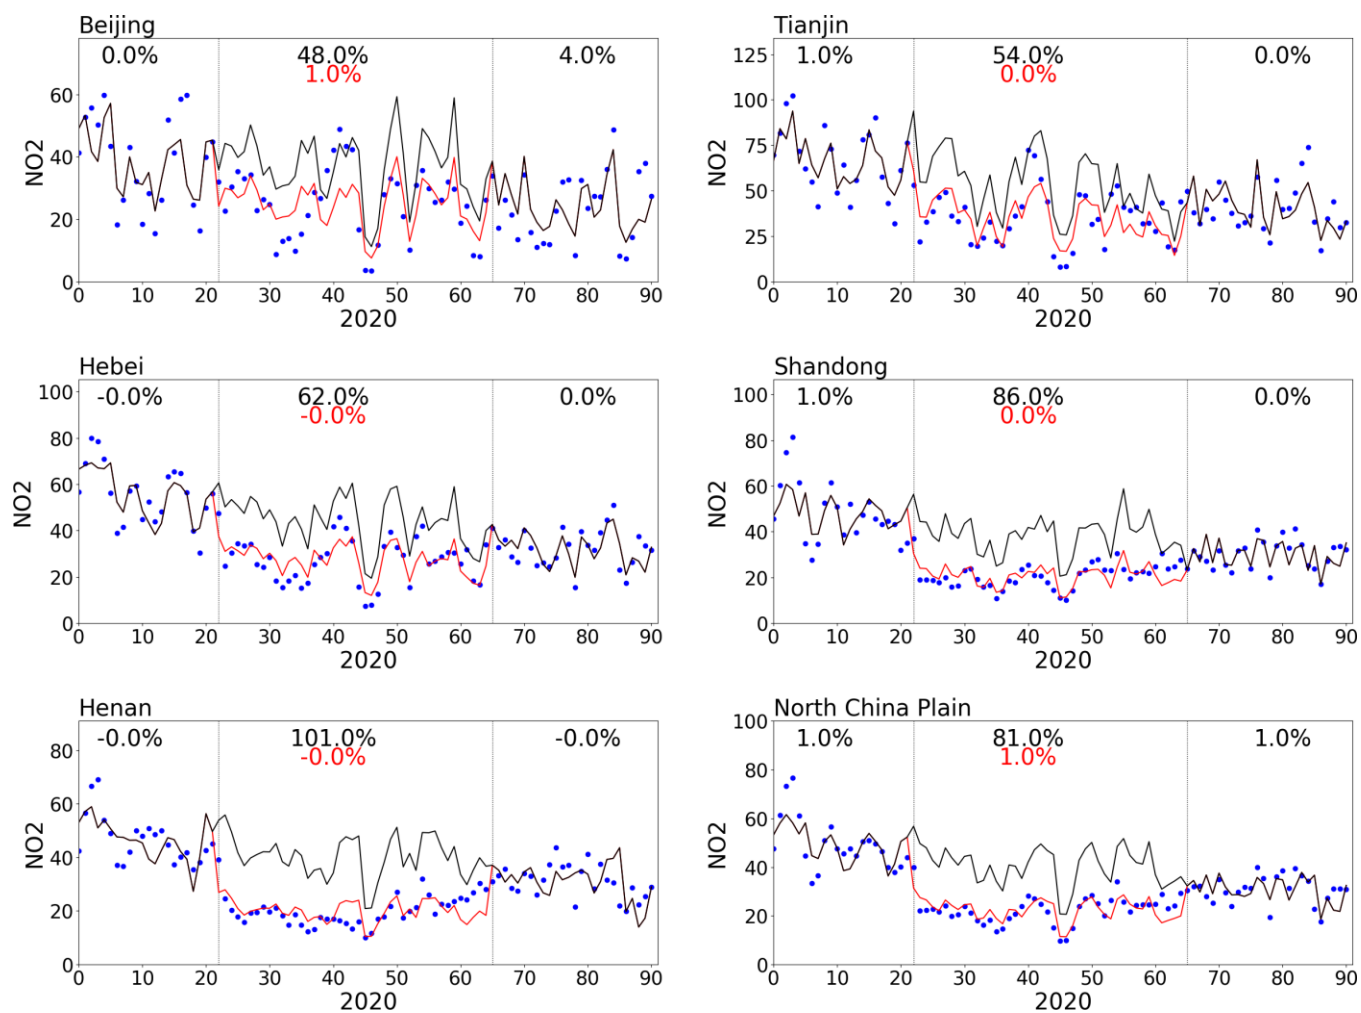

**Figure S2** Same as Figure S1 but in 2020

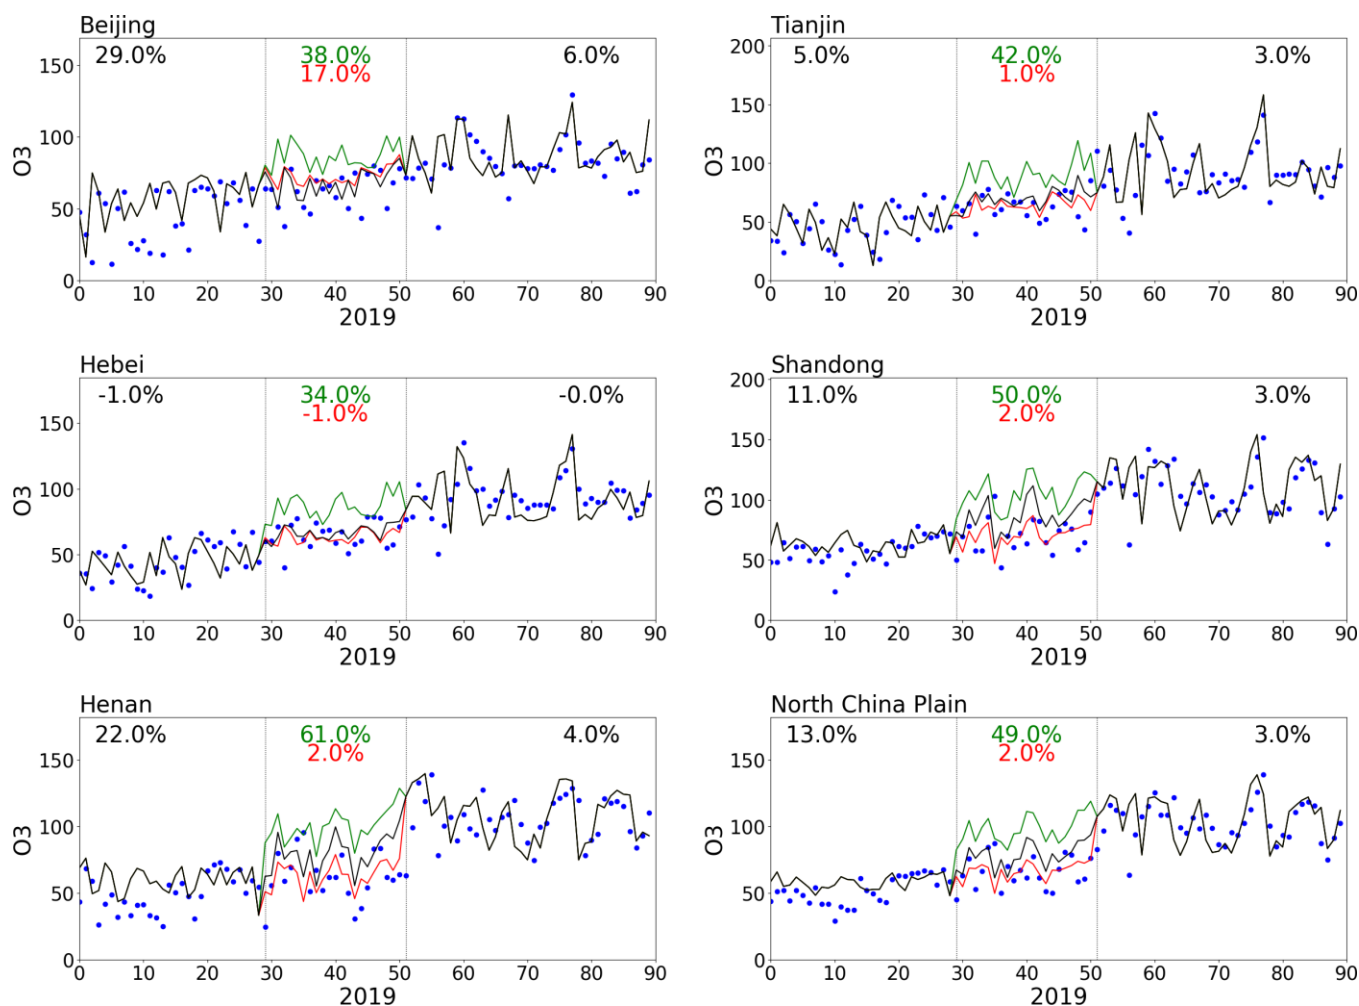

**Figure S3** Comparison of the simulated average concentrations of O<sub>3</sub> in NCP (the percentage numbers indicate the normalized mean biases in hypothesis and actual simulations respectively for Period 2. Blue dots: observations; Black line: simulations using adjusted emission with no consideration of shutdown influences; Red line: simulations using adjusted emission with consideration of shutdown influences; Green line: simulations using adjusted emission with consideration of shut-down influences but without VOC; unit:  $\mu\text{g m}^{-3}$ )

23

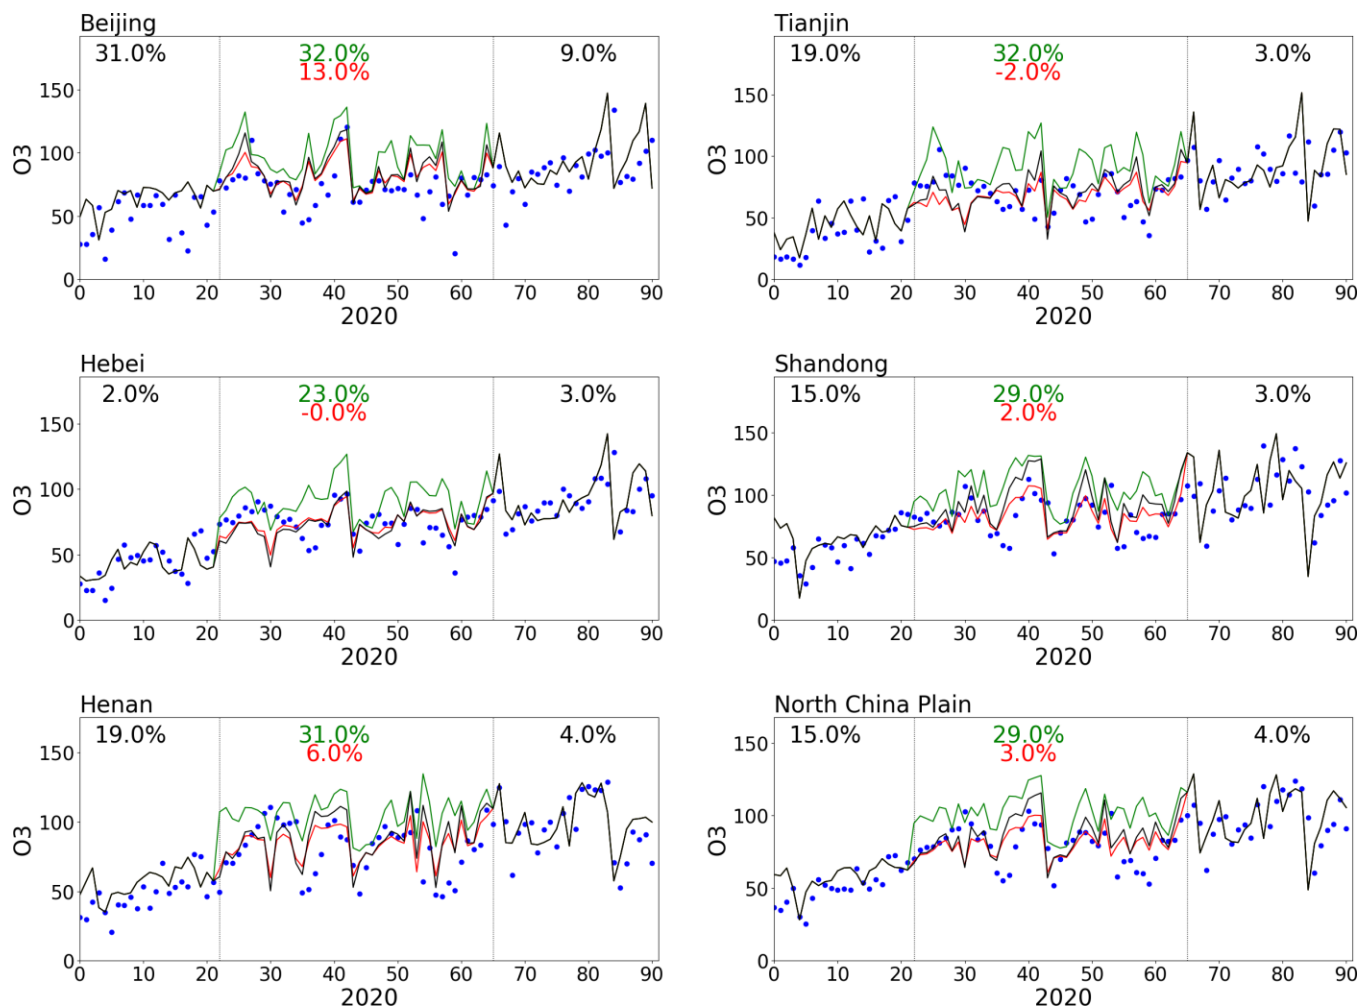

**Figure S4** Same as Figure S3 but in 2020

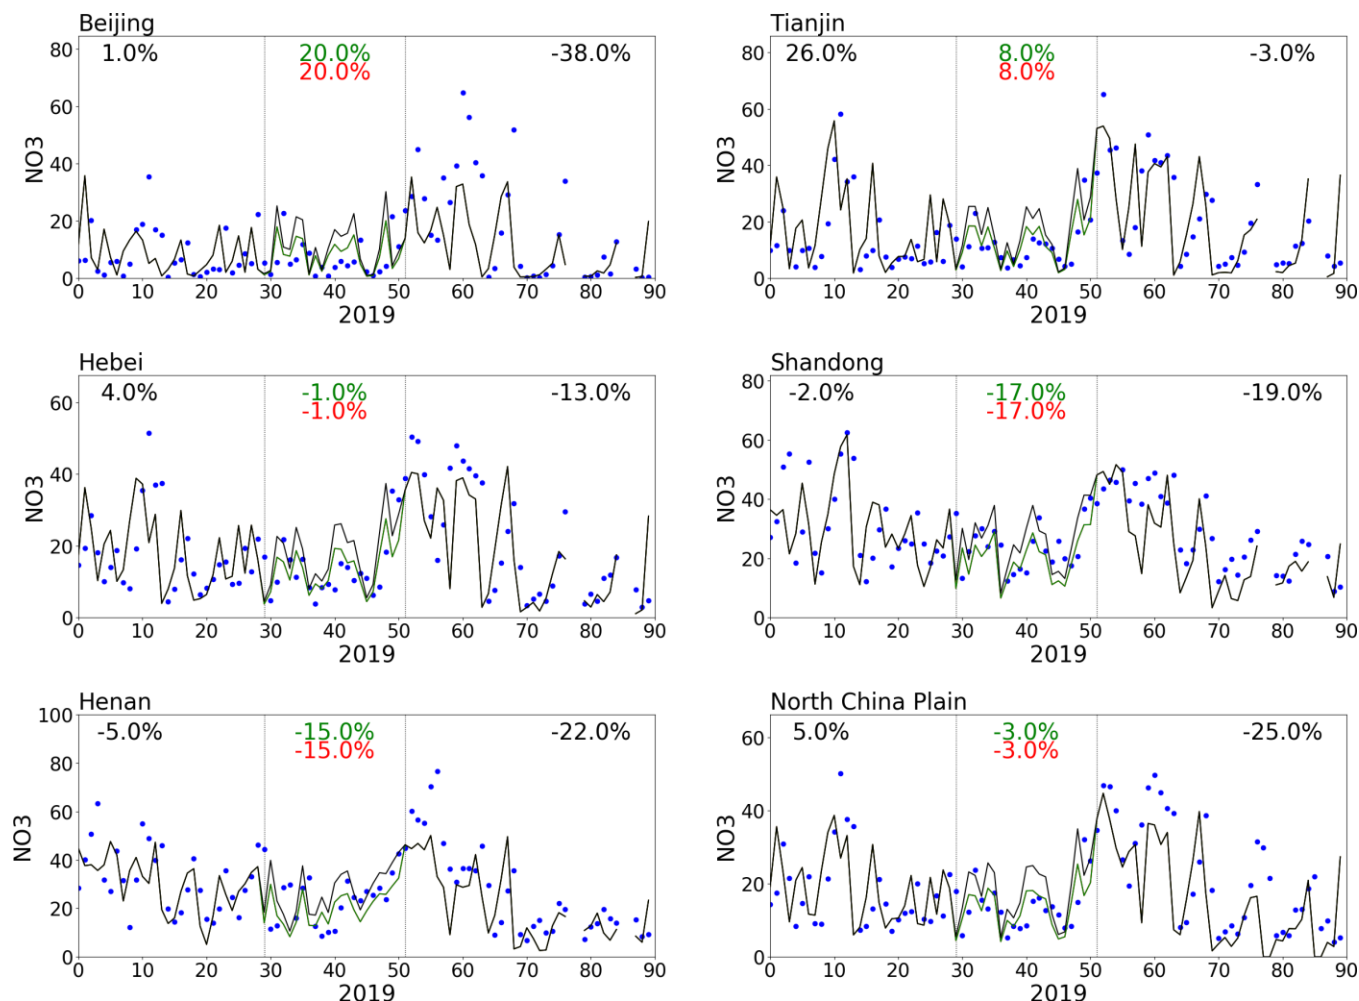

28

29 **Figure S5** Comparison of the simulated average concentrations of  $\text{NO}_3^-$  in NCP (the percentage numbers  
 30 indicate the normalized mean biases in hypothesis and actual simulations respectively for Period 2. Blue  
 31 dots: observations; Black line: simulations using adjusted emission with no consideration of shutdown  
 32 influences; Red line: simulations using adjusted emission with consideration of shutdown influences;  
 33 Green line: simulations using adjusted emission with consideration of shut-down influences but without  
 34  $\text{NH}_3$ ; unit:  $\mu\text{g m}^{-3}$ )

35

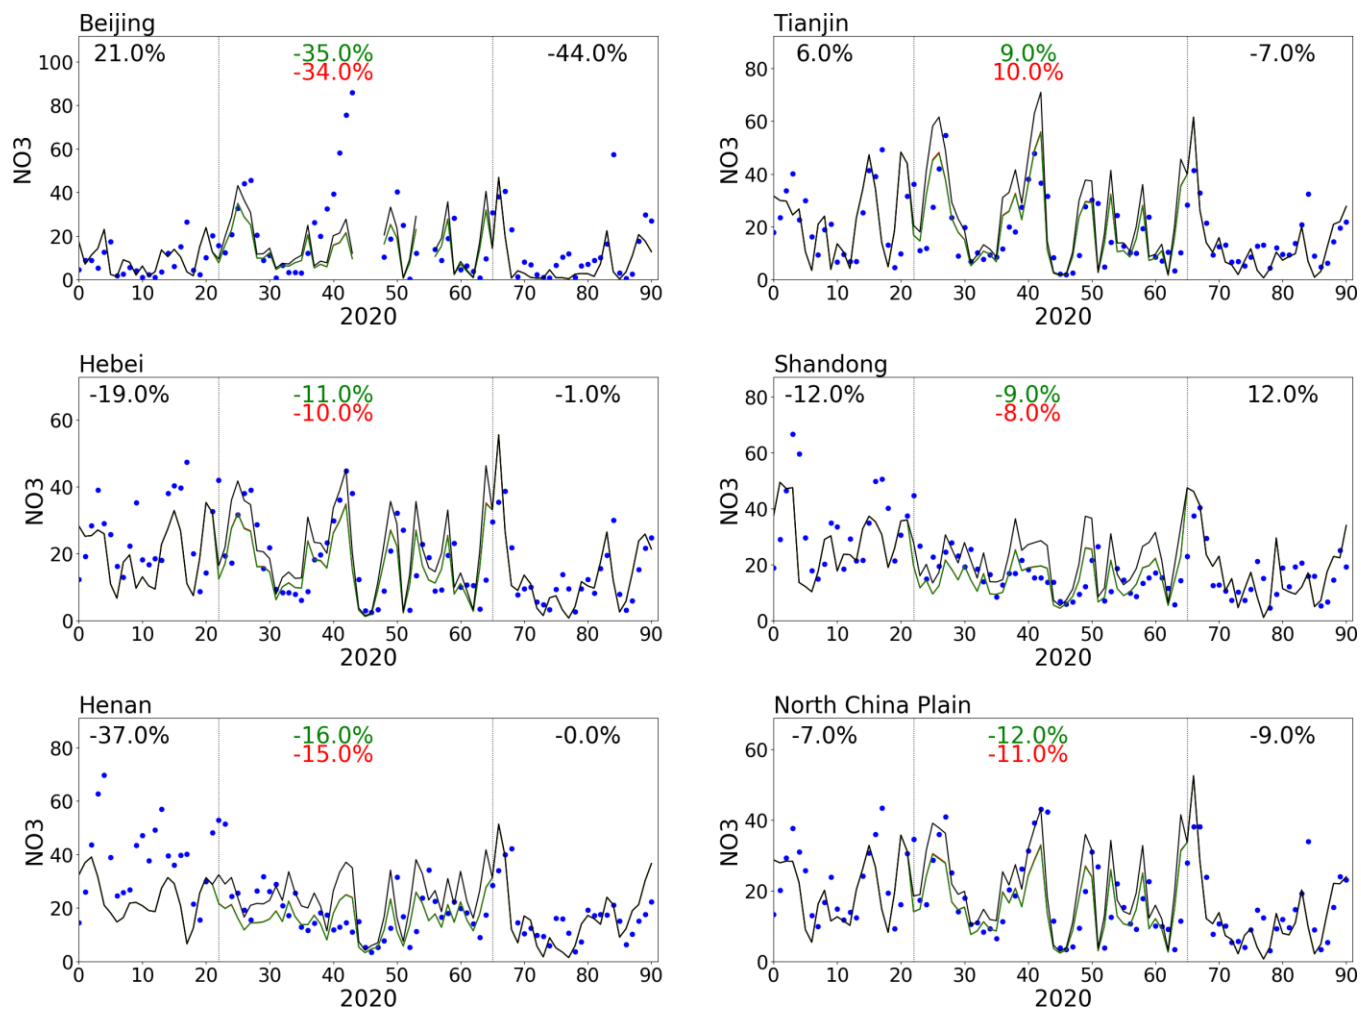

**Figure S6** Same as Figure S5 but in 2020

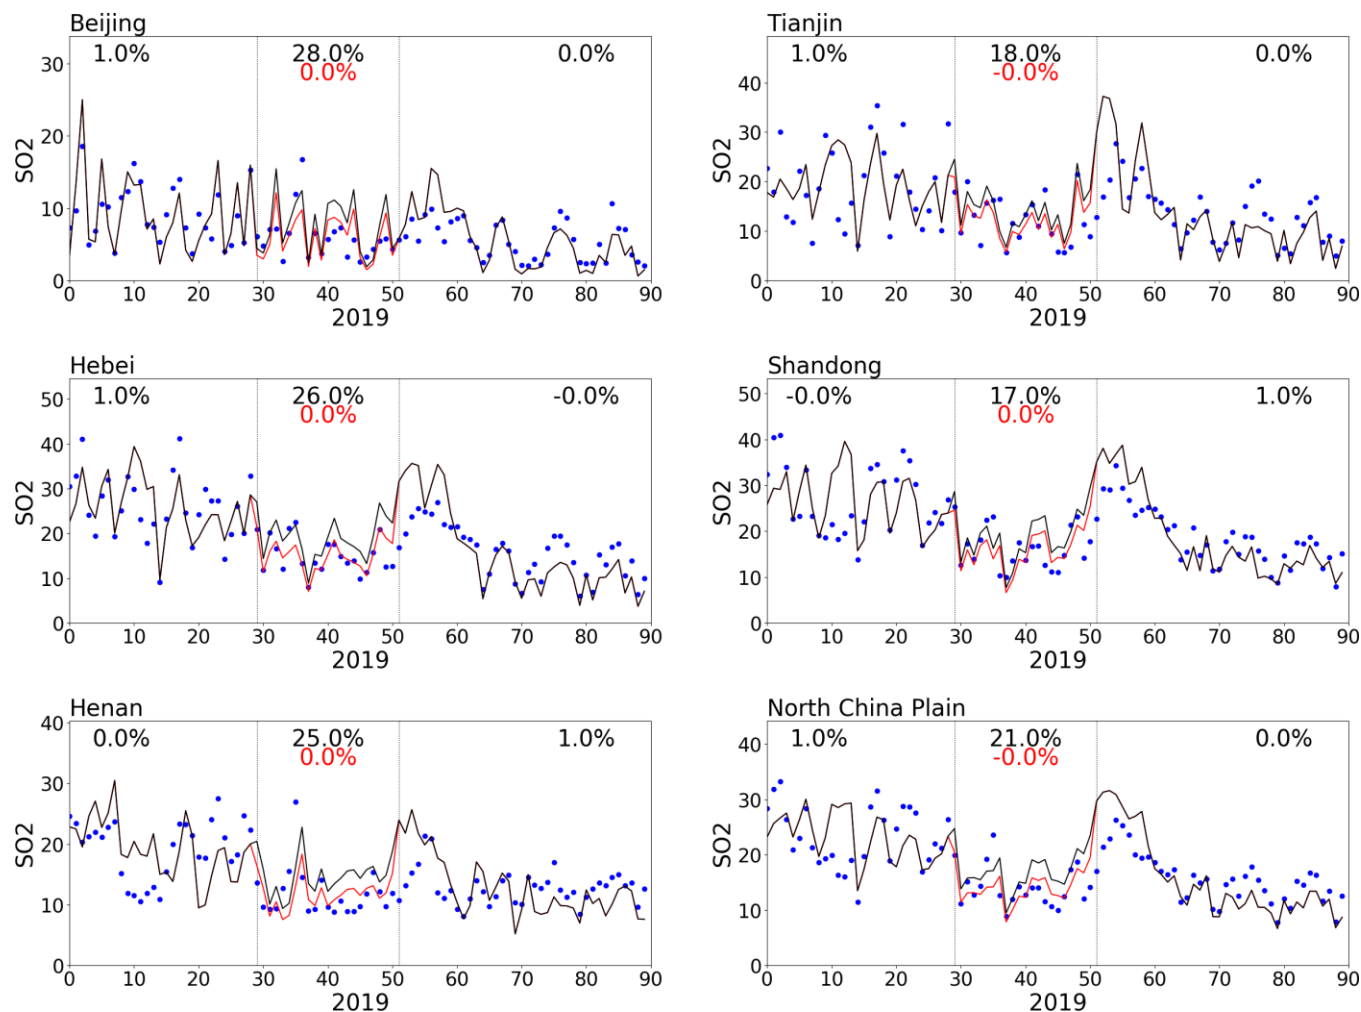

41

42 **Figure S7** Comparison of the simulated average concentrations of SO<sub>2</sub> in NCP (the percentage numbers  
 43 indicate the normalized mean biases in hypothesis and actual simulations respectively for Period 2. Blue  
 44 dots: observations; Black line: simulations using adjusted emission with no consideration of shutdown  
 45 influences; Red line: simulations using adjusted emission with consideration of shutdown influences;  
 46 unit:  $\mu\text{g m}^{-3}$ )

47



48

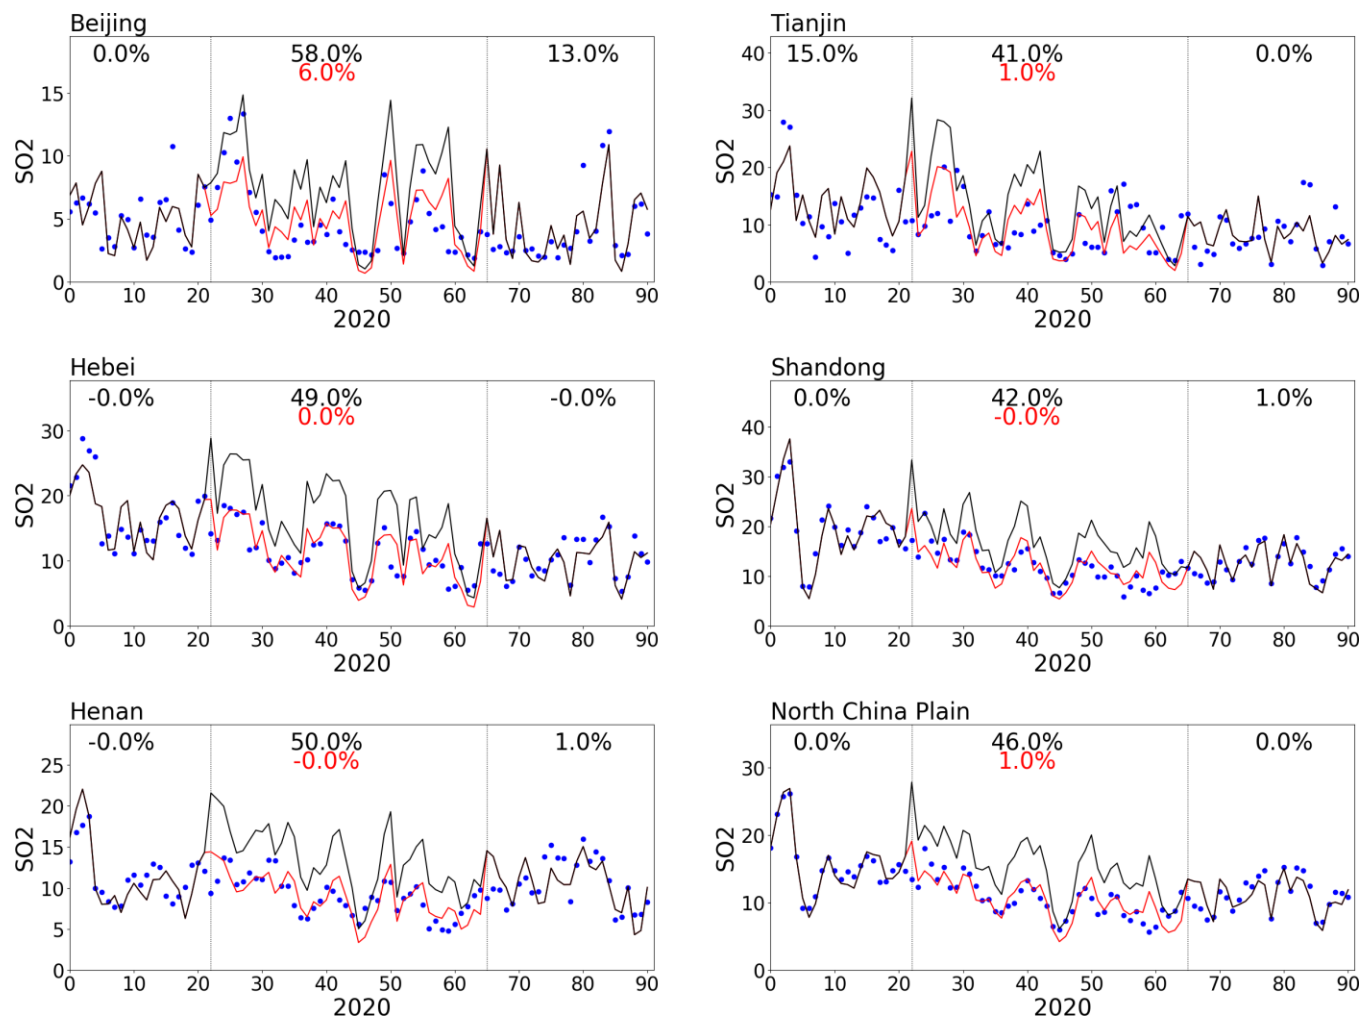

**Figure S8** Same as Figure S7 but in 2020

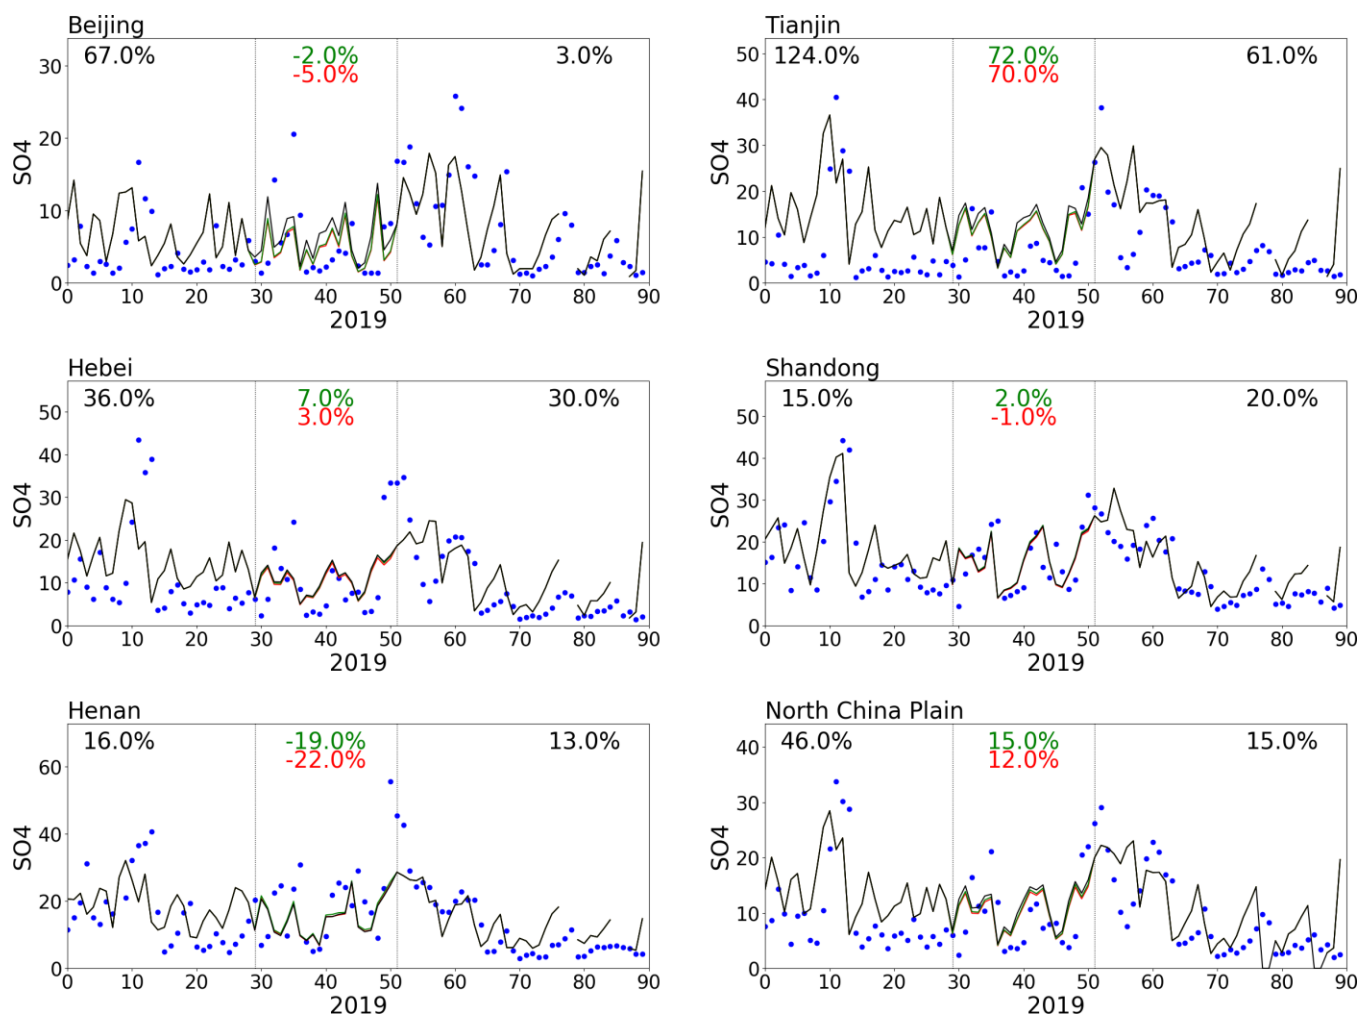

**Figure S9** Comparison of the simulated average concentrations of  $\text{SO}_4^{2-}$  in NCP (the percentage numbers indicate the normalized mean biases in hypothesis and actual simulations respectively for Period 2. Blue dots: observations; Black line: simulations using adjusted emission with no consideration of shutdown influences; Red line: simulations using adjusted emission with consideration of shutdown influences; Green line: simulations using adjusted emission with consideration of shut-down influences but without  $\text{SO}_2$ ; unit:  $\mu\text{g m}^{-3}$ )

59

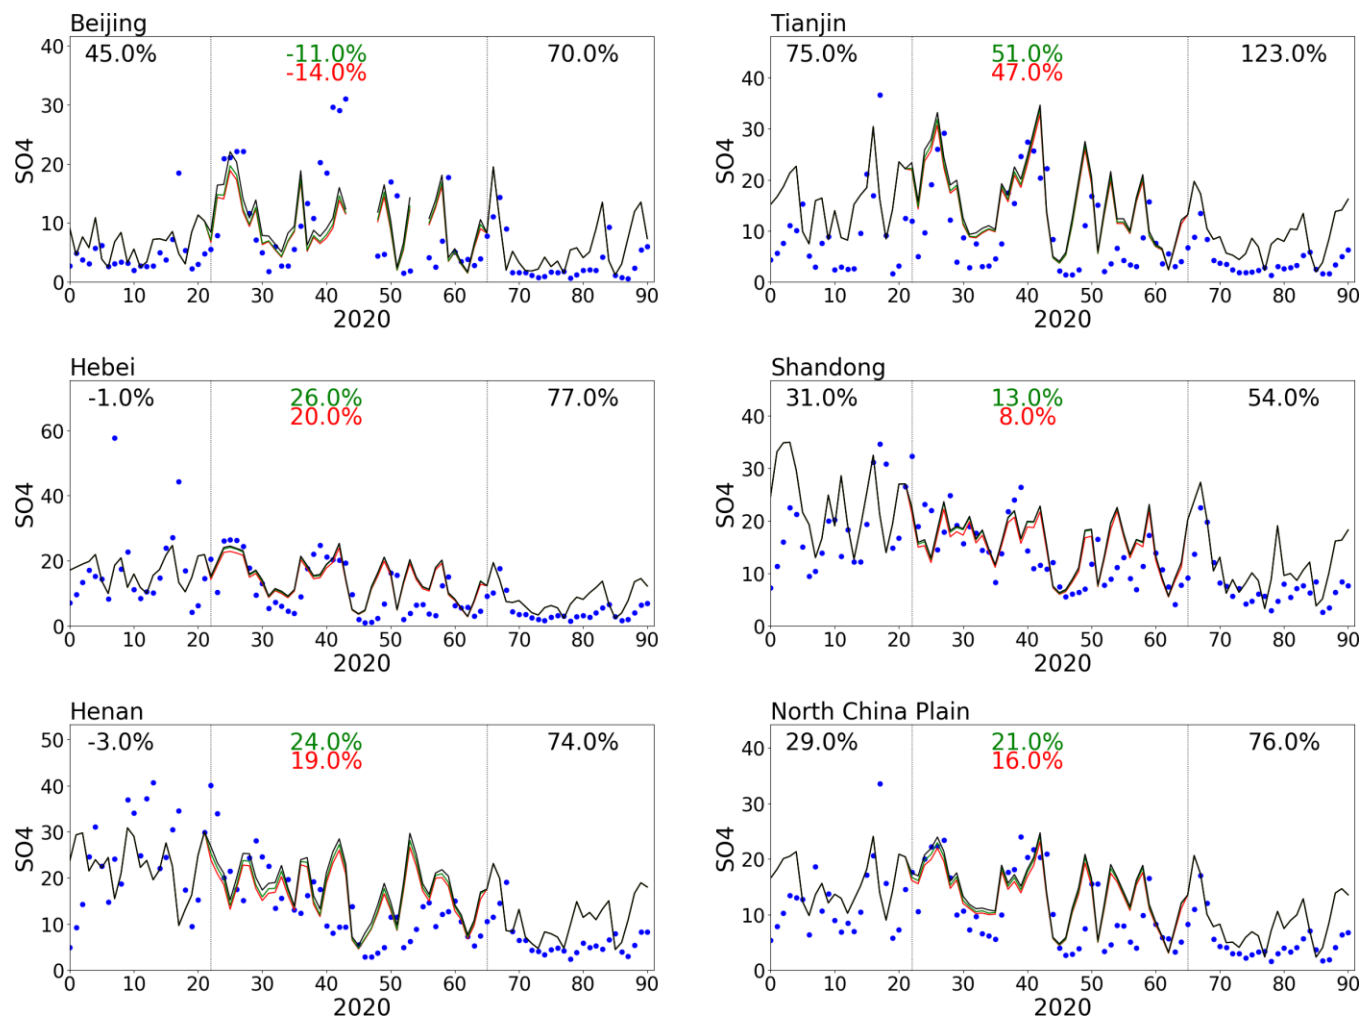

**Figure S10** Same as Figure S9 but in 2020

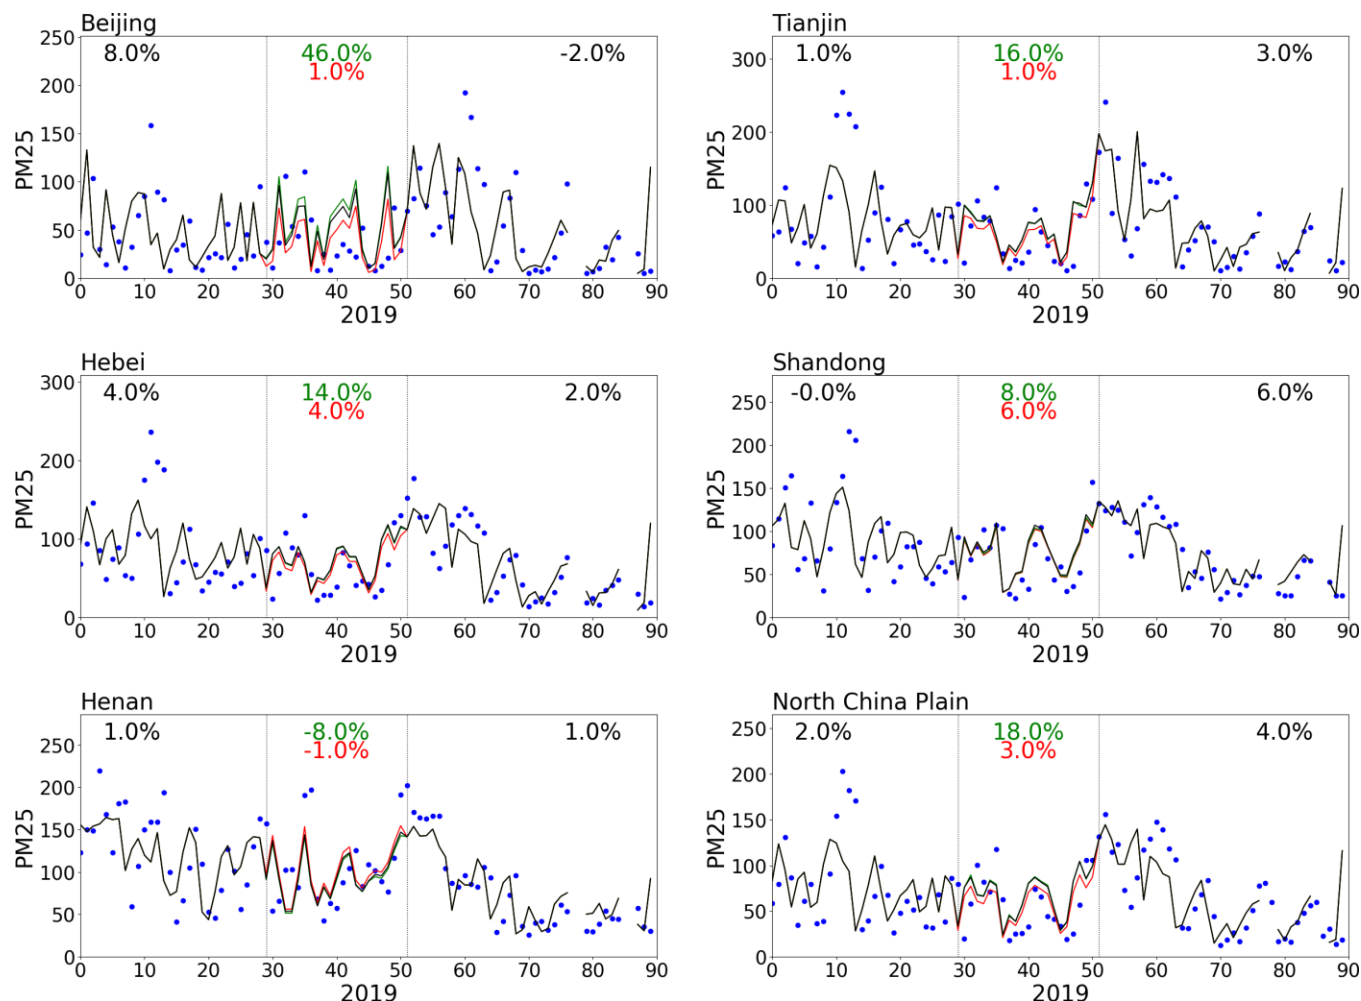

64

65

**Figure S11** Comparison of the simulated average concentrations of PM<sub>2.5</sub> in NCP (the percentage numbers indicate the normalized mean biases in hypothesis and actual simulations respectively for Period 2. Blue dots: observations; Black line: simulations using adjusted emission with no consideration of shutdown influences; Red line: simulations using adjusted emission with consideration of shutdown influences; Green line: simulations using adjusted emission with consideration of shut-down influences but without primary PM<sub>2.5</sub>; unit: µg m<sup>-3</sup>)

72

73

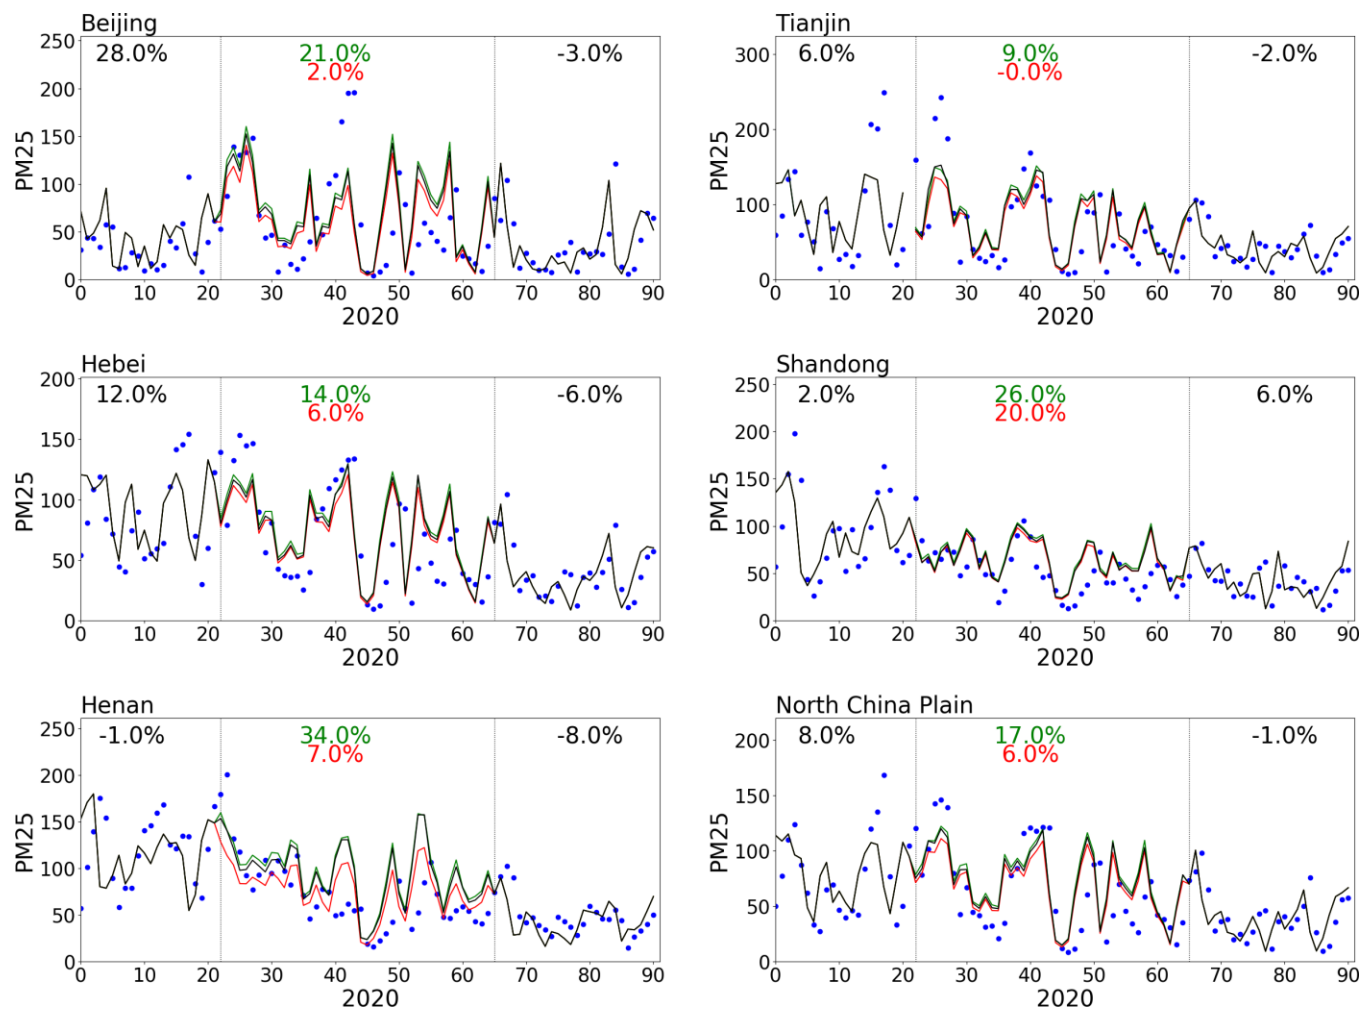

74

75

76

**Figure S12** Same as Figure S11 but in 2020
